# Supplementary material for: Activation of the N2 molecule by means of low-valence complexes of calcium and magnesium
Source: Royal Society of Chemistry journal article supplement (doi:10.1039/d3dt00945a), 2023-01-01

## SI - Activation of the N<sub>2</sub> molecule by means of low-valence complexes of calcium and magnesium

Table S1 - Geometry parameters obtained by optimizing species **2**<sub>Ca</sub> and **3**<sub>Ca</sub> at the BP86-D3(BJ)/def2-TZVP/def2-SVP level of theory.

|        | <b>2</b> <sub>Ca</sub> |      | <b>3</b> <sub>Ca</sub> |      |
|--------|------------------------|------|------------------------|------|
|        | <i>Exp</i>             |      | <i>Exp</i>             |      |
| N1=N2  | 1.27                   | 1.26 | 1.26                   | 1.26 |
| Ca1-N1 | 2.30                   | 2.30 | 2.30                   | 2.28 |
| Ca1-N2 | 2.31                   | 2.31 | 2.30                   | 2.29 |
| Ca2-N1 | 2.31                   | 2.31 | 2.30                   | 2.29 |
| Ca2-N2 | 2.30                   | 2.30 | 2.30                   | 2.29 |
| Ca1-N3 | 2.40                   | 2.39 | 2.39                   | 2.38 |
| Ca1-N4 | 2.42                   | 2.42 | 2.40                   | 2.37 |
| Ca2-N5 | 2.40                   | 2.40 | 2.40                   | 2.37 |
| Ca2-N6 | 2.42                   | 2.42 | 2.40                   | 2.37 |
| Ca1-O  | 2.40                   | 2.39 | 2.39                   | 2.39 |
| Ca2-O  | 2.41                   | 2.39 | 2.39                   | 2.39 |

Figure S1 - Graphical representation of the observed N<sub>2</sub> coordination mode at the [(BDI)Mg(THF)] compound. Colour pattern: grey, C; blue, N; red, O; magenta, Mg. Hydrogen atoms are omitted for clarity.

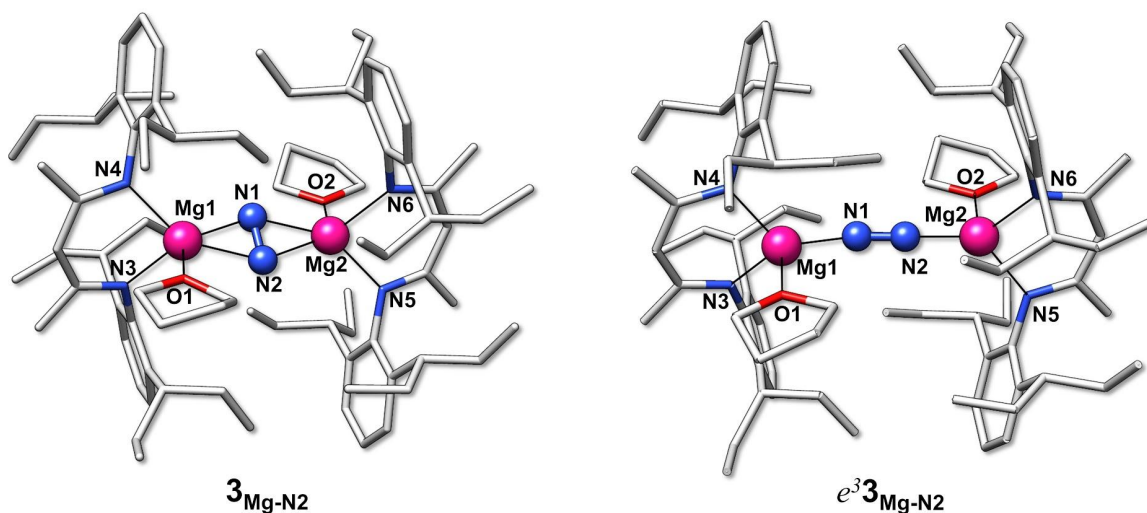

Table S2 - Natural atomic charges and natural atomic orbital occupancies (in brackets) computed for  $e^3 2_{Mg-N2}$  and  $e^3 3_{Mg-N2}$ .

|     | $e^3 2_{Mg-N2}$ | $e^3 3_{Mg-N2}$ |
|-----|-----------------|-----------------|
| Mg1 | 1.80 (10)       | 1.80 (10)       |
| Mg2 | 1.80 (10)       | 1.80 (10)       |
| N1  | -0.87 (8)       | -0.85 (8)       |
| N2  | -0.87 (8)       | -0.87 (8)       |

Figure S2 - Graphical representation of the transition state **2TS** and **3TS**. Colour pattern: grey, C; blue, N; red, O; green, Ca. Hydrogen atoms are omitted for clarity.

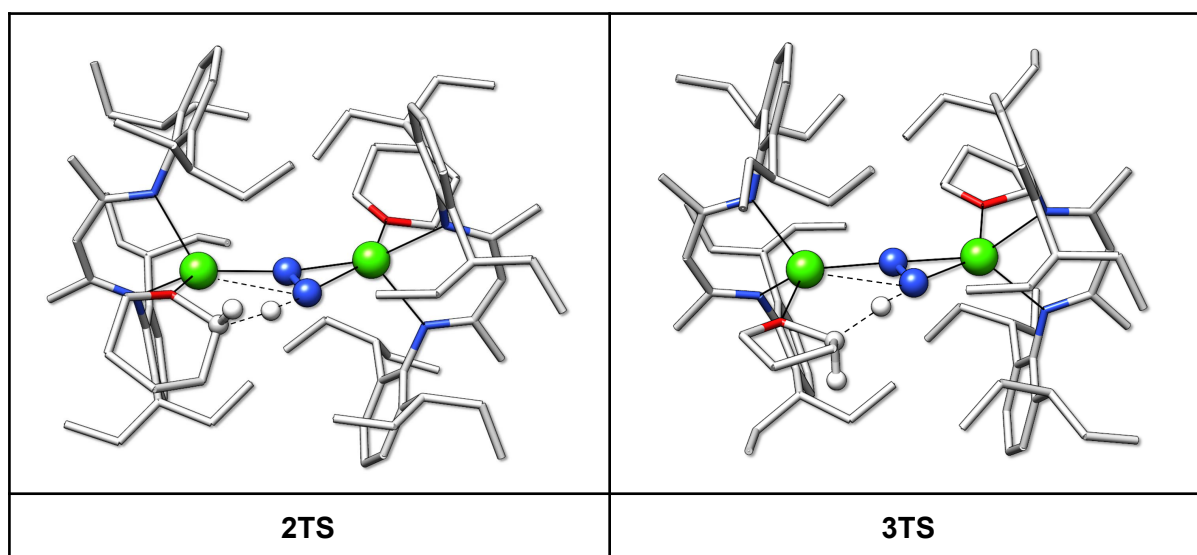

Figure S3 - Graphical representation of protonation reaction product  $e^1 2I_{Mg}$  and  $e^1 3I_{Mg}$ . Colour pattern as in Figure S1.

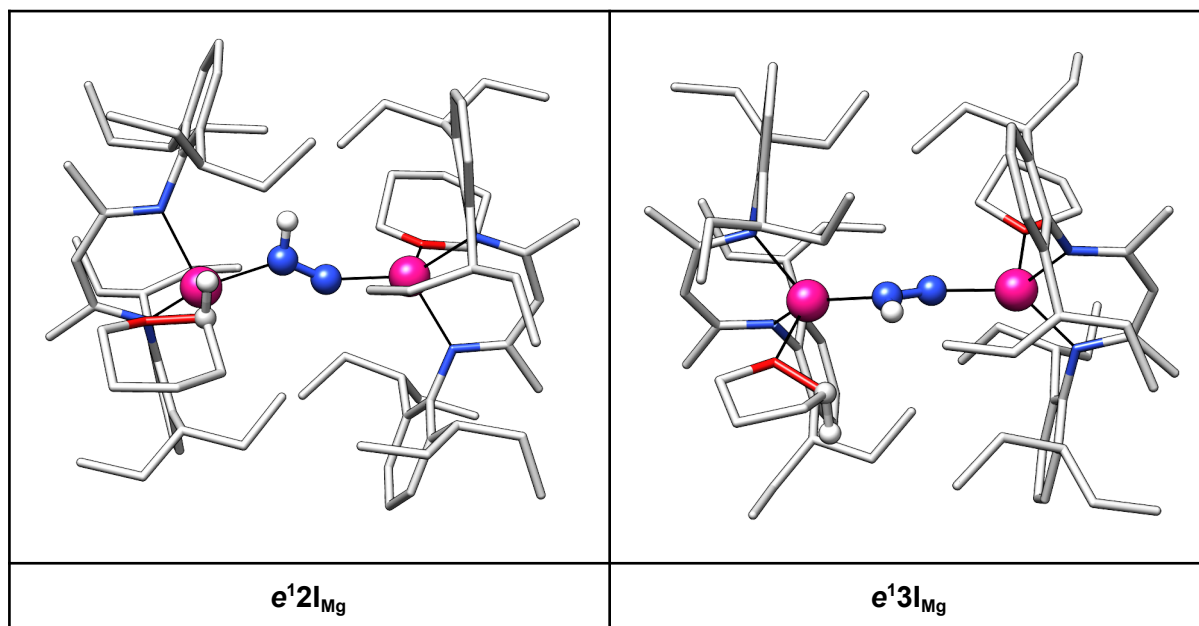

Figure S4 - Graphical representation of protonation reaction product  $e^3 2P_{Mg}$  and  $e^3 3P_{Mg}$ . Colour pattern as in Figure S1.

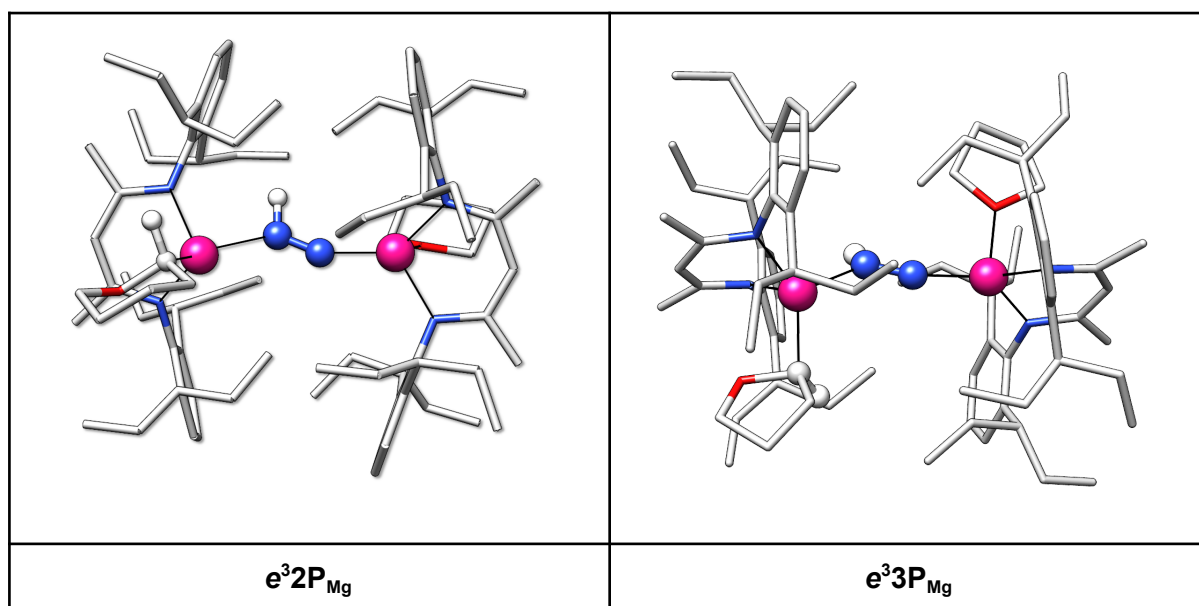

Supplement: d3dt00945a1.pdf [file d3dt00945a1.pdf]
